# Supplementary material for: Cutaneous Adverse Events in the Randomized, Double-Blind, Active-Comparator DECIDE Study of Daclizumab High-Yield Process Versus Intramuscular Interferon Beta-1a in Relapsing-Remitting Multiple Sclerosis
Source: Springer Nature journal article supplement (doi:10.1007/s12325-016-0353-2), 2016-06-01

## **SUPPLEMENTARY MATERIAL**

### **Appendix S1**

#### **Summary of the Guidelines for Management of Cutaneous Events in DECIDE**

Guidelines for the management of patients with cutaneous adverse events (AEs) were provided to the study investigators. The guidelines recommended that patients who experienced a clinically significant cutaneous AE in the opinion of the investigator should be evaluated by a dermatologist to document the event, take photographs, and perform a skin biopsy, if appropriate. Localized or highly circumscribed cutaneous AEs were to be managed according to standard local medical practices and systemic corticosteroids were allowed, as indicated. The guidelines indicated that patients with any diffuse cutaneous AE were to be seen by a dermatologist within 72 h after the onset of the event to assess, photograph, and perform a skin biopsy, if appropriate. In patients with a diffuse or severe cutaneous AE, study treatment was to be withheld until the AE resolved. If an allergic hypersensitivity reaction was suspected, study treatment was to be permanently discontinued. For all other cutaneous AEs, permanent discontinuation of study treatment was at the discretion of the investigator in consultation with the dermatologist. Patients with diffuse rash that was highly inflammatory at presentation, or worsened over time (e.g., increased body surface area, more lesions, mucosal involvement), or persisted for more than 1 week without improvement were to be evaluated for appropriateness for corticosteroid treatment. If corticosteroid treatment was not contraindicated, the patient was to be treated with high-dose systemic corticosteroids (equivalent to prednisone 60 mg or intravenous methylprednisolone 1 g/day) for approximately 5 days followed by gradual taper if the AE had stabilized, or treated with alternate therapies if the AE had not improved. Other treatments were to be considered for patients in whom corticosteroids were contraindicated.

**Table S1** Protocol guidance for AE severity rating and classification of serious AEs

---

**Investigators rated the severity of each AE using the following guidance:**

|          |                                                                                                                                                                                                                                                 |
|----------|-------------------------------------------------------------------------------------------------------------------------------------------------------------------------------------------------------------------------------------------------|
| Mild     | Symptom(s) barely noticeable by the patient or did not make them uncomfortable; did not influence performance or functioning; prescription drug not ordinarily needed for relief of symptom(s), but could be given based on patient personality |
| Moderate | Symptom(s) of a sufficient severity to make the patient uncomfortable; performance of daily activity influenced; patient was able to continue in study; treatment for symptom(s) could be needed                                                |
| Severe   | Symptom(s) caused severe discomfort, incapacitation or significant impact on patient's daily life; severity could cause cessation of study treatment; treatment for symptom(s) could be given and/or patient hospitalized                       |

---

**An AE was deemed serious if it met the following criteria:**

|            |                                                                                                                                                                                                                                                                                                                                                                                                                                  |
|------------|----------------------------------------------------------------------------------------------------------------------------------------------------------------------------------------------------------------------------------------------------------------------------------------------------------------------------------------------------------------------------------------------------------------------------------|
| Serious AE | AE that required hospitalization or a prolongation of existing hospitalization; resulted in persistent or significant disability/incapacity, congenital anomaly/birth defect or death; life-threatening event in the opinion of the investigator; medically important event in the opinion of the investigator that could have jeopardized the patient or required intervention to prevent one of the previously listed outcomes |
|------------|----------------------------------------------------------------------------------------------------------------------------------------------------------------------------------------------------------------------------------------------------------------------------------------------------------------------------------------------------------------------------------------------------------------------------------|

---

*AE* adverse event

**Table S2** Topical corticosteroids: relative potency of various formulations

| <b>Class</b>            | <b>Drug</b>                          | <b>Dosage Form(s)</b>             | <b>Strength (%)</b>           |     |
|-------------------------|--------------------------------------|-----------------------------------|-------------------------------|-----|
| I. Very high potency    | Augmented betamethasone dipropionate | Ointment                          | 0.05                          |     |
|                         | Clobetasol propionate                | Cream, foam, ointment             | 0.05                          |     |
|                         | Diflorasone diacetate                | Ointment                          | 0.05                          |     |
|                         | Halobetasol propionate               | Cream, ointment                   | 0.05                          |     |
| II. High potency        | Amcinonide                           | Cream, lotion, ointment           | 0.1                           |     |
|                         | Augmented betamethasone dipropionate | Cream                             | 0.05                          |     |
|                         | Betamethasone dipropionate           | Cream, foam, ointment, solution   | 0.05                          |     |
|                         | Desoximetasone                       | Cream, ointment                   | 0.25                          |     |
|                         | Desoximetasone                       | Gel                               | 0.05                          |     |
|                         | Diflorasone diacetate                | Cream                             | 0.05                          |     |
|                         | Fluocinonide                         | Cream, gel, ointment, solution    | 0.05                          |     |
|                         | Halcinonide                          | Cream, ointment                   | 0.1                           |     |
|                         | Mometasone furoate                   | Ointment                          | 0.1                           |     |
|                         | Triamcinolone acetonide              | Cream, ointment                   | 0.5                           |     |
|                         | III–IV. Medium potency               | Betamethasone valerate            | Cream, foam, lotion, ointment | 0.1 |
| Clocortolone pivalate   |                                      | Cream                             | 0.1                           |     |
| Desoximetasone          |                                      | Cream                             | 0.05                          |     |
| Fluocinolone acetonide  |                                      | Cream, ointment                   | 0.025                         |     |
| Flurandrenolide         |                                      | Cream, ointment                   | 0.05                          |     |
| Fluticasone propionate  |                                      | Cream                             | 0.05                          |     |
| Fluticasone propionate  |                                      | Ointment                          | 0.005                         |     |
| Mometasone furoate      |                                      | Cream                             | 0.1                           |     |
| Triamcinolone acetonide |                                      | Cream, ointment                   | 0.1                           |     |
| V. Lower-medium potency |                                      | Hydrocortisone butyrate           | Cream, ointment, solution     | 0.1 |
|                         |                                      | Hydrocortisone probutate          | Cream                         | 0.1 |
|                         | Hydrocortisone valerate              | Cream, ointment                   | 0.2                           |     |
|                         | Prednicarbate                        | Cream                             | 0.1                           |     |
| VI. Low potency         | Alclometasone dipropionate           | Cream, ointment                   | 0.05                          |     |
|                         | Desonide                             | Cream, gel, foam, ointment        | 0.05                          |     |
|                         | Fluocinolone acetonide               | Cream, solution                   | 0.01                          |     |
| VII. Lowest potency     | Dexamethasone                        | Cream                             | 0.1                           |     |
|                         | Hydrocortisone                       | Cream, lotion, ointment, solution | 0.25, 0.5, 1                  |     |
|                         | Hydrocortisone acetate               | Cream, ointment                   | 0.5–1                         |     |

This table was published in Hurwitz Clinical Pediatric Dermatology, 4th edition, Paller AS and Mancini AJ, eds, Chapter 3: Eczematous eruptions in childhood. p. 49. Copyright Elsevier (2011)

Includes representative examples and not all available agents

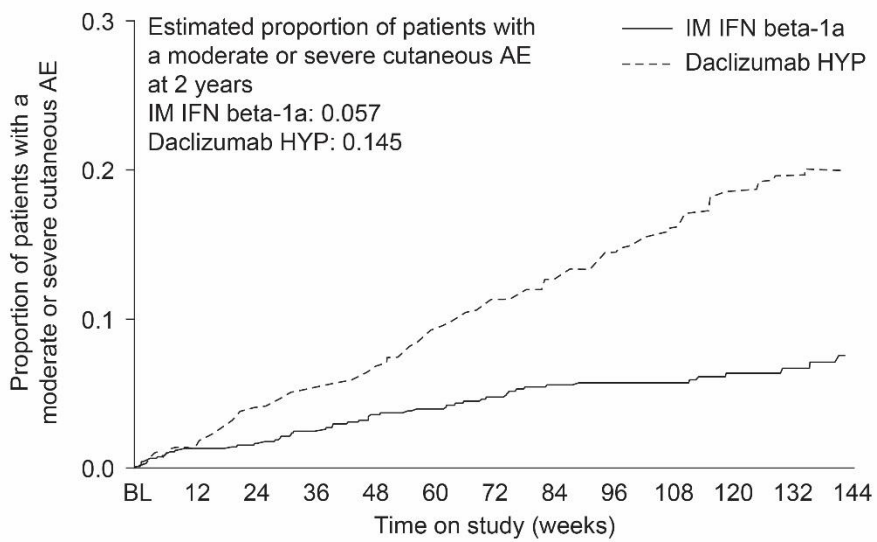

No. of patients at risk:

|                |     |     |     |     |     |     |     |     |     |     |     |     |     |
|----------------|-----|-----|-----|-----|-----|-----|-----|-----|-----|-----|-----|-----|-----|
| IM IFN beta-1a | 922 | 876 | 849 | 816 | 776 | 743 | 704 | 677 | 657 | 507 | 398 | 276 | 162 |
| Daclizumab HYP | 919 | 892 | 858 | 823 | 798 | 744 | 712 | 675 | 646 | 517 | 385 | 275 | 148 |

**Figure S1** Kaplan–Meier plot of time to first moderate or severe cutaneous AE. AE adverse event, BL baseline, HYP high-yield process, IFN interferon, IM intramuscular

**Figure S2** Examples of mild (**a**), moderate (**b**), and severe (**c**) cutaneous AEs reported in daclizumab HYP-treated patients. Individual pictures of the same event differ only because of magnification. *AE* adverse event, *HYP* high-yield process

**a** Examples of mild cutaneous AEs reported in daclizumab HYP-treated patients

**Mild event example 1**

Central dermatologist's description of the cutaneous AE: "These lesions are deep seated vesicles arising from spongiosis or a process that is part of the eczema spectrum of diseases. Hand and foot dermatitis was a common diagnosis in DECIDE. This particular lesion is a pattern termed pompholyx (pompholyx eczema)."

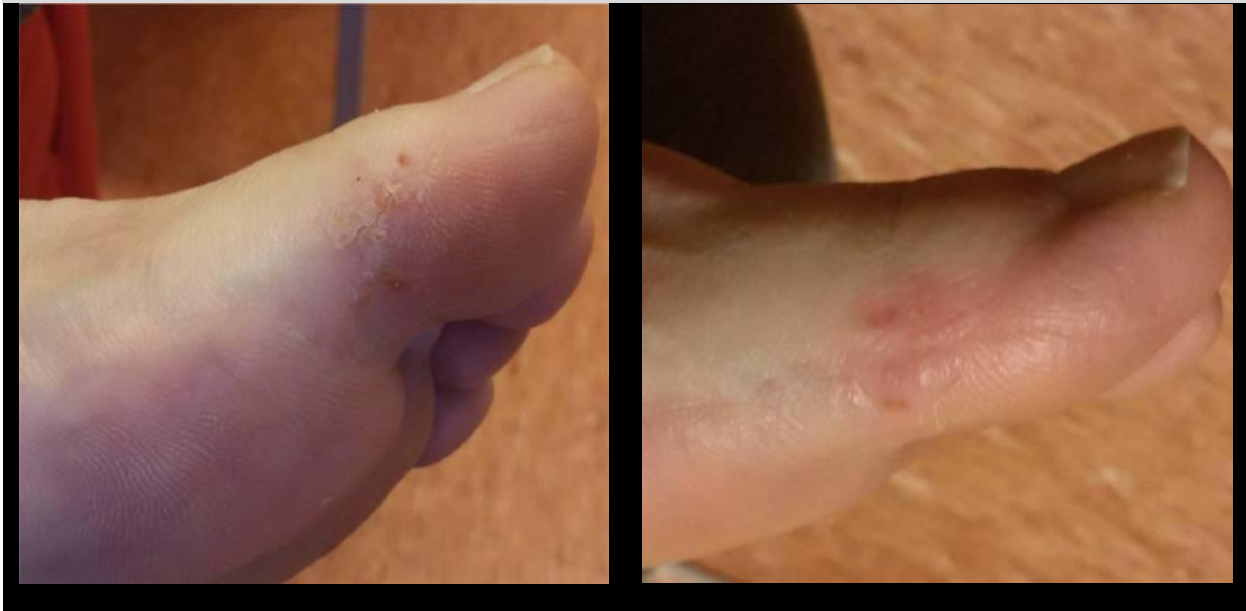

**Mild event example 2**

Central dermatologist's description of the cutaneous AE: "This is an example of a very mild eczema.

The rash is quite subtle."

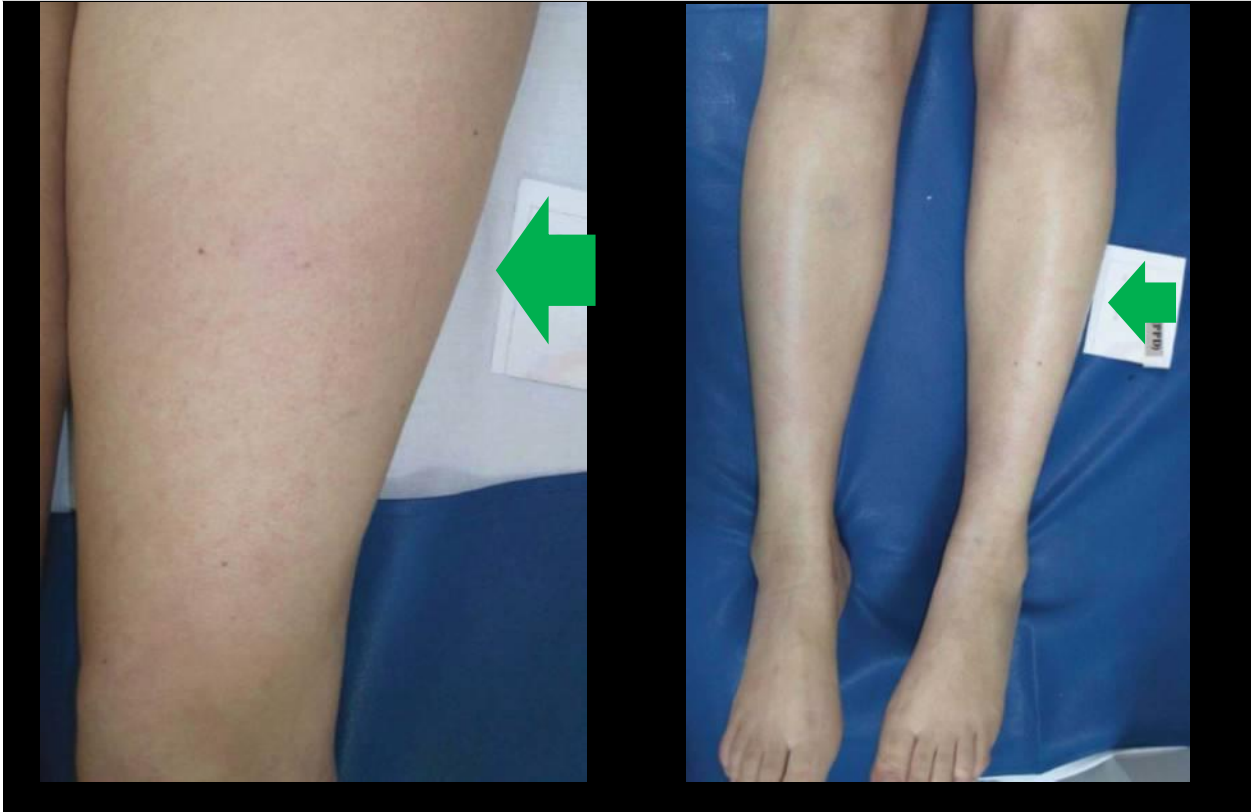

**b** Examples of moderate cutaneous AEs reported in daclizumab HYP-treated patients

**Moderate event example 1**

Central dermatologist's description of the cutaneous AE: "These are eczema lesions. In the study, both 'allergic dermatitis' and 'eczema' were used to describe these type of cutaneous AEs depending on the country of origin of the patient."

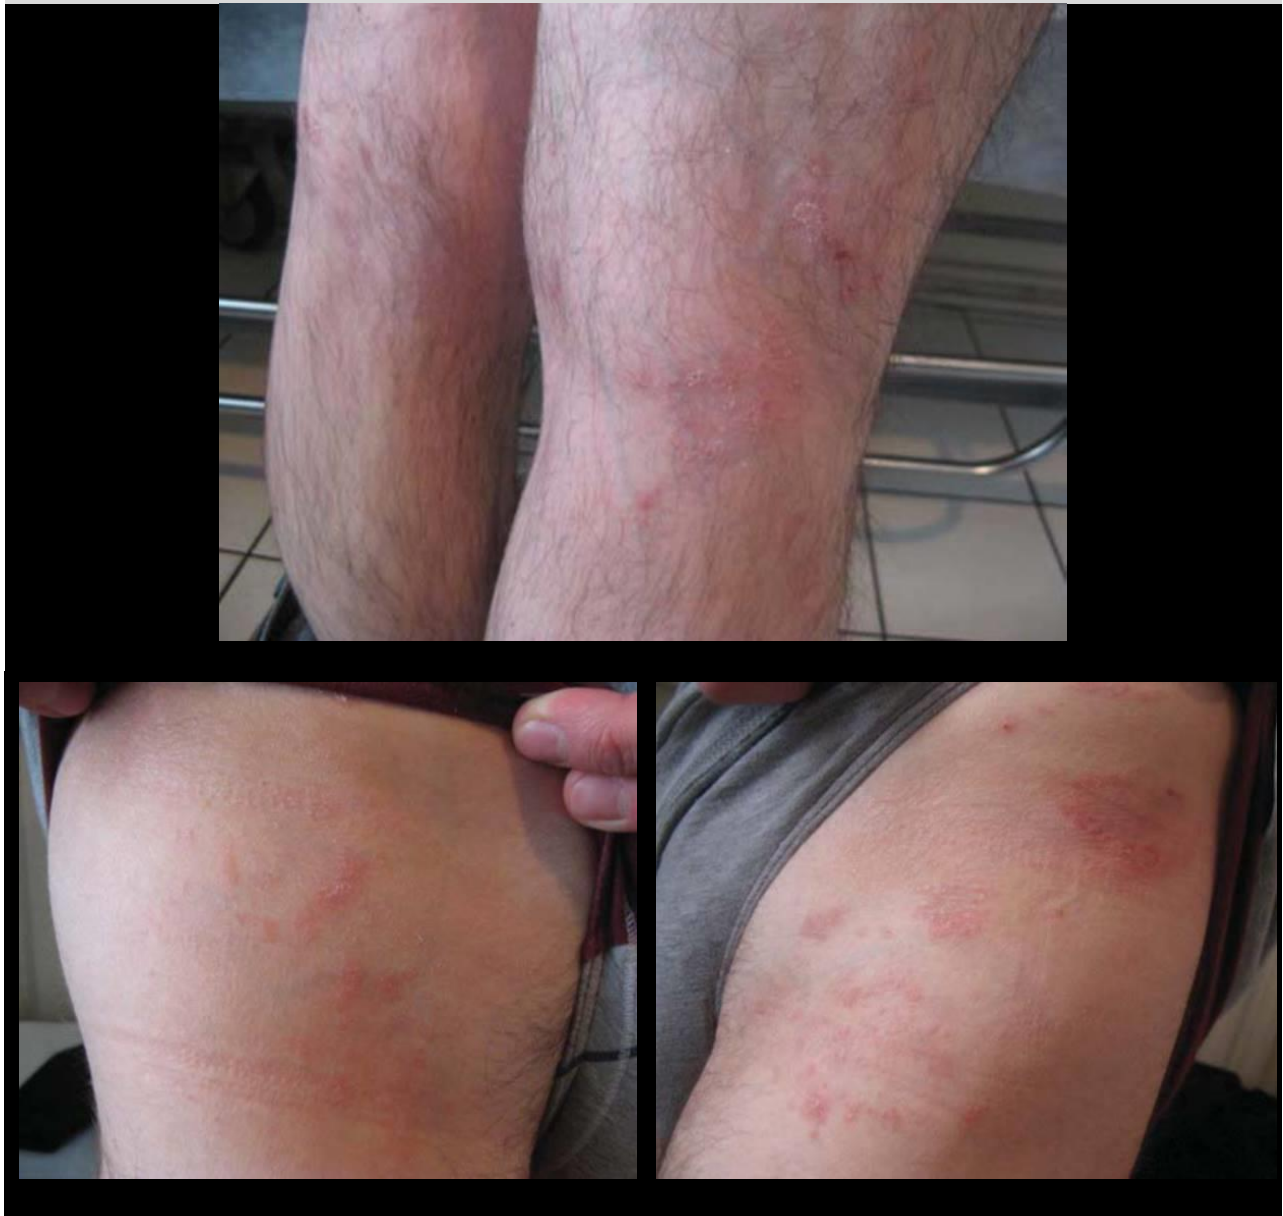

**Moderate event example 2**

Central dermatologist's description of the cutaneous AE: "This case shows a follicular pattern. It could be follicular eczema or just folliculitis."

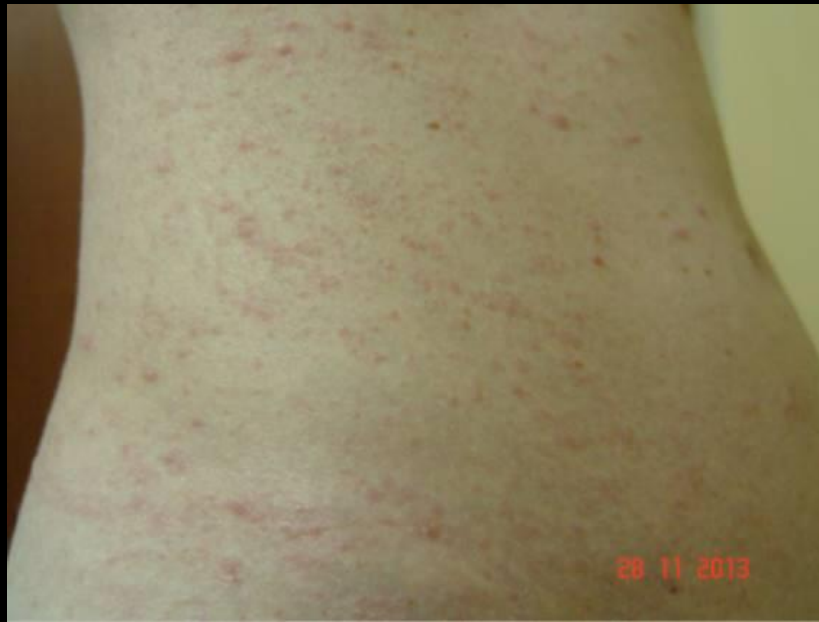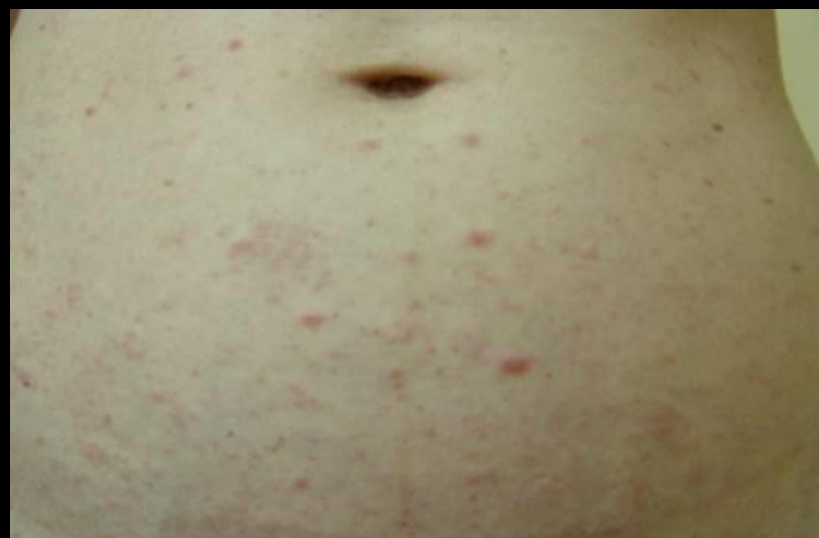



**c** Examples of severe cutaneous AEs reported in daclizumab HYP-treated patients

**Severe event example 1**

Central dermatologist's description of the cutaneous AE: "There are small to large areas of erythema (macules and patches of erythema) and some dermatographism caused by scratching, but the upper chest is clear. The abdomen is diffusely red with some focal scaling or superficial exfoliation. There is a scaly plaque on the forearm that is red colored. The cutaneous AE is a likely delayed-type hypersensitivity reaction to a systemic antigen and it could be a 'drug' reaction to daclizumab."

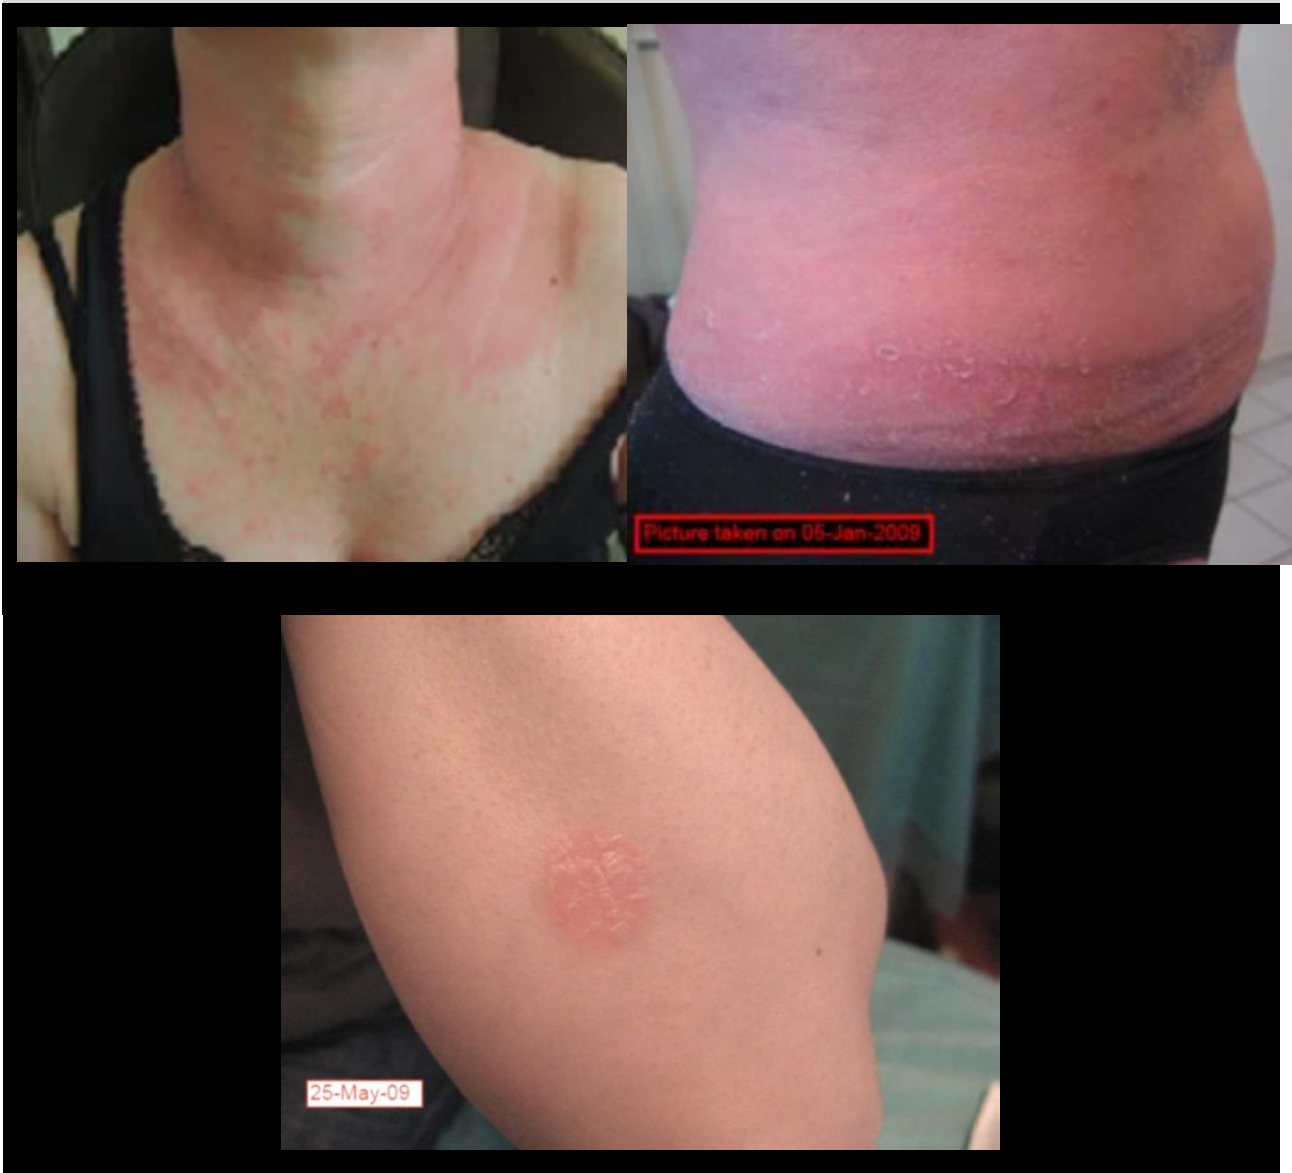

## Severe event example 2

Central dermatologist's description of the cutaneous AE: "This is a drug-type hypersensitivity rash pattern with the side of face and neck being more typical maculopapular lesions with some confluence to larger lesions (a macule or papule is <1 cm in size). Exfoliation is a superficial process of loss of corneocytes. The reaction of the skin involves some degree of mucositis with involvement of the lips and tongue, as seen in the pictures."

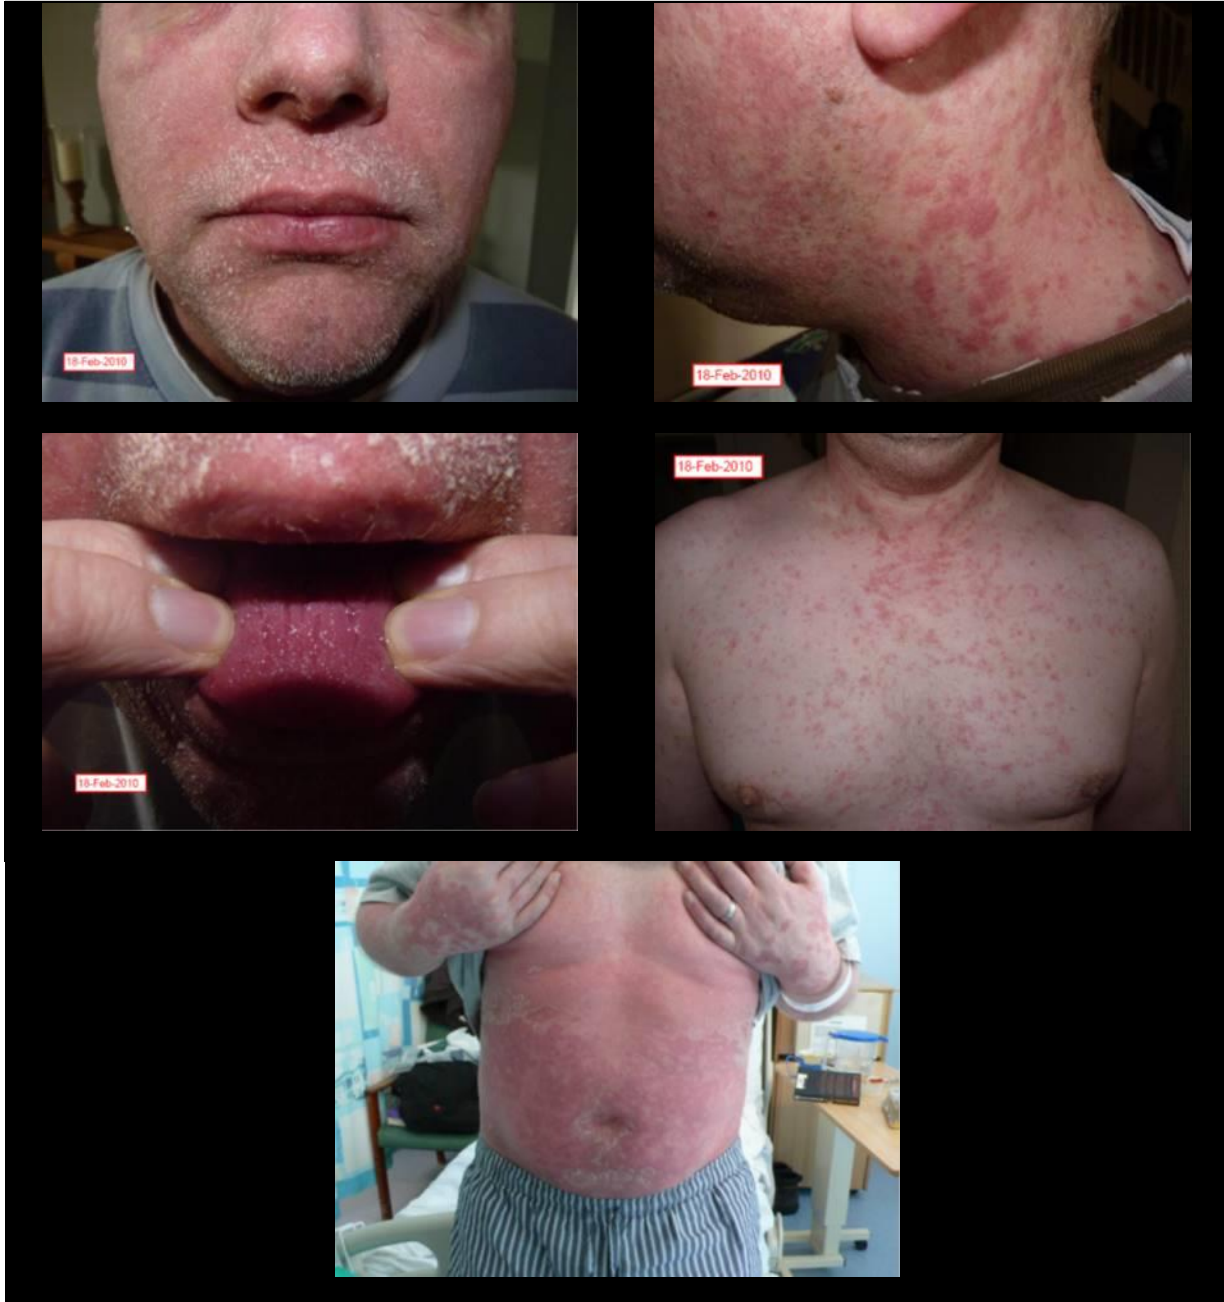

Supplement: MOESM1 [file 10242344]
